# Supplementary material for: Control of carrier mobilities for performance enhancement of anthracene-based polymer solar cells
Source: Royal Society of Chemistry journal article supplement (doi:10.1039/c5ra07792c), 2015-01-01
Supplement: c5ra07792c1.pdf [file c5ra07792c1.pdf]

## Supporting information

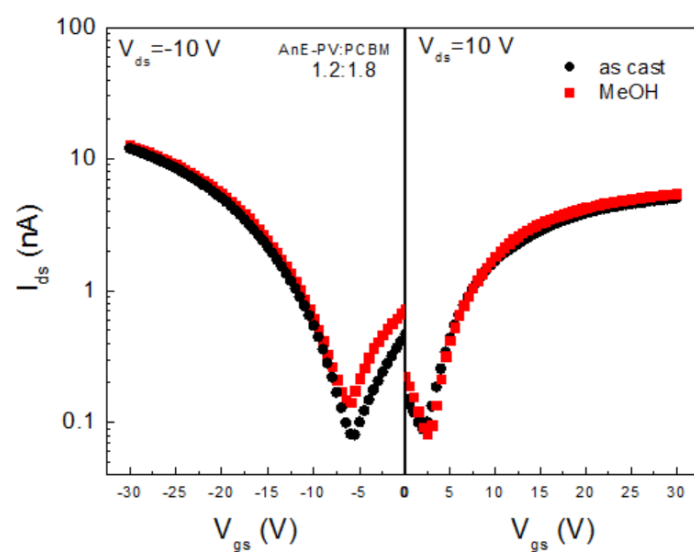

Fig S1. Transfer characteristics of OFETs with AnE-PV :PCBM (1.2 :1.8) as active layer with and without methanol treatment.

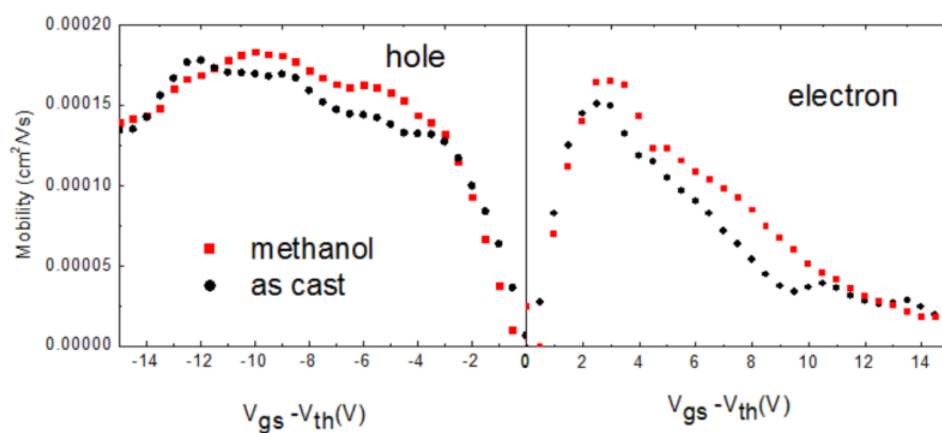

Fig S2. Derived gate voltage dependant mobilities in saturation regime.
